# Supplementary material for: Controllable synthesis of uniform ZnO nanorods and their enhanced dielectric and absorption properties
Source: Royal Society of Chemistry journal article supplement (doi:10.1039/c4ta00485j), 2014-01-01
Supplement: c4ta00485j1.pdf [file c4ta00485j1.pdf]

## Supporting Information

# Controllable Synthesis of Uniform ZnO Nanorods and their Enhanced Dielectric and Absorption Properties

*Guang-Sheng Wang<sup>a\*</sup>, Ying-Ying Wu<sup>a</sup>, Xiao-Juan Zhang<sup>a</sup>, Yong Li<sup>b</sup>, Lin Guo<sup>a\*</sup>, and  
Mao-Sheng Cao<sup>b\*</sup>*

*<sup>a</sup> Key Laboratory of Bio-Inspired Smart Interfacial Science and Technology of  
Ministry of Education, School of Chemistry and Environment, Beihang University,  
Beijing 100191, PR China.*

*<sup>b</sup>School of Materials Science and Engineering, Beijing Institute of Technology,  
Beijing 100081, China.*

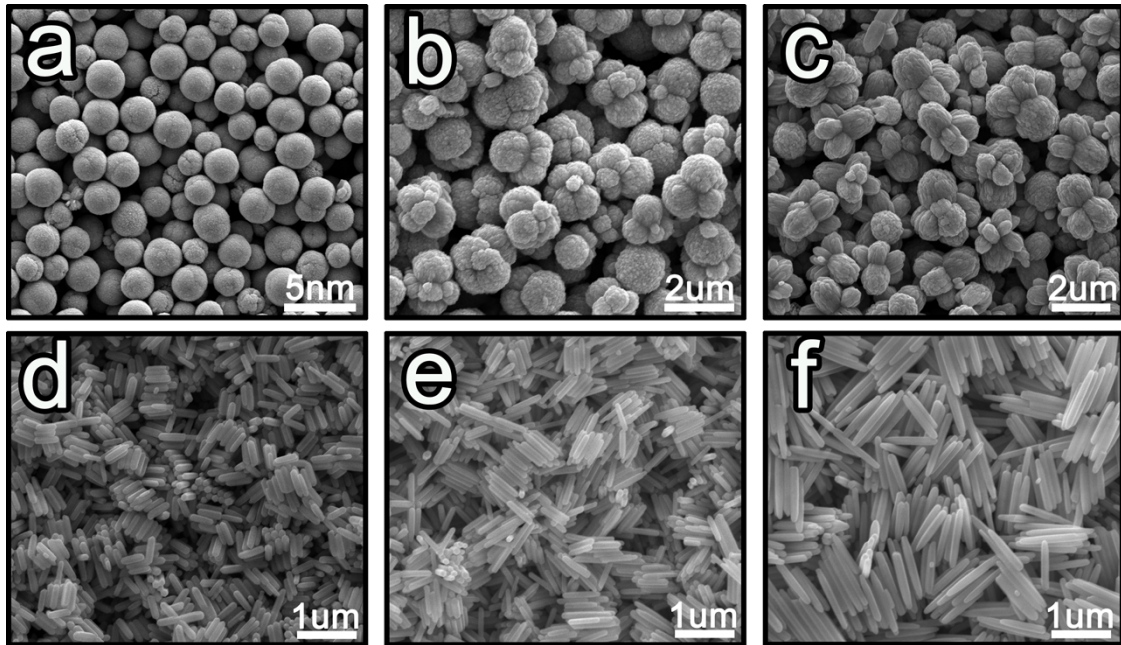

**Figure S1.** The SEM images of the products synthesized with different amount of hydrazine hydrate: a) 6 ml; b) 8 ml; c) 12 ml; d) 20 ml; e) 25 ml; f) 30 ml.

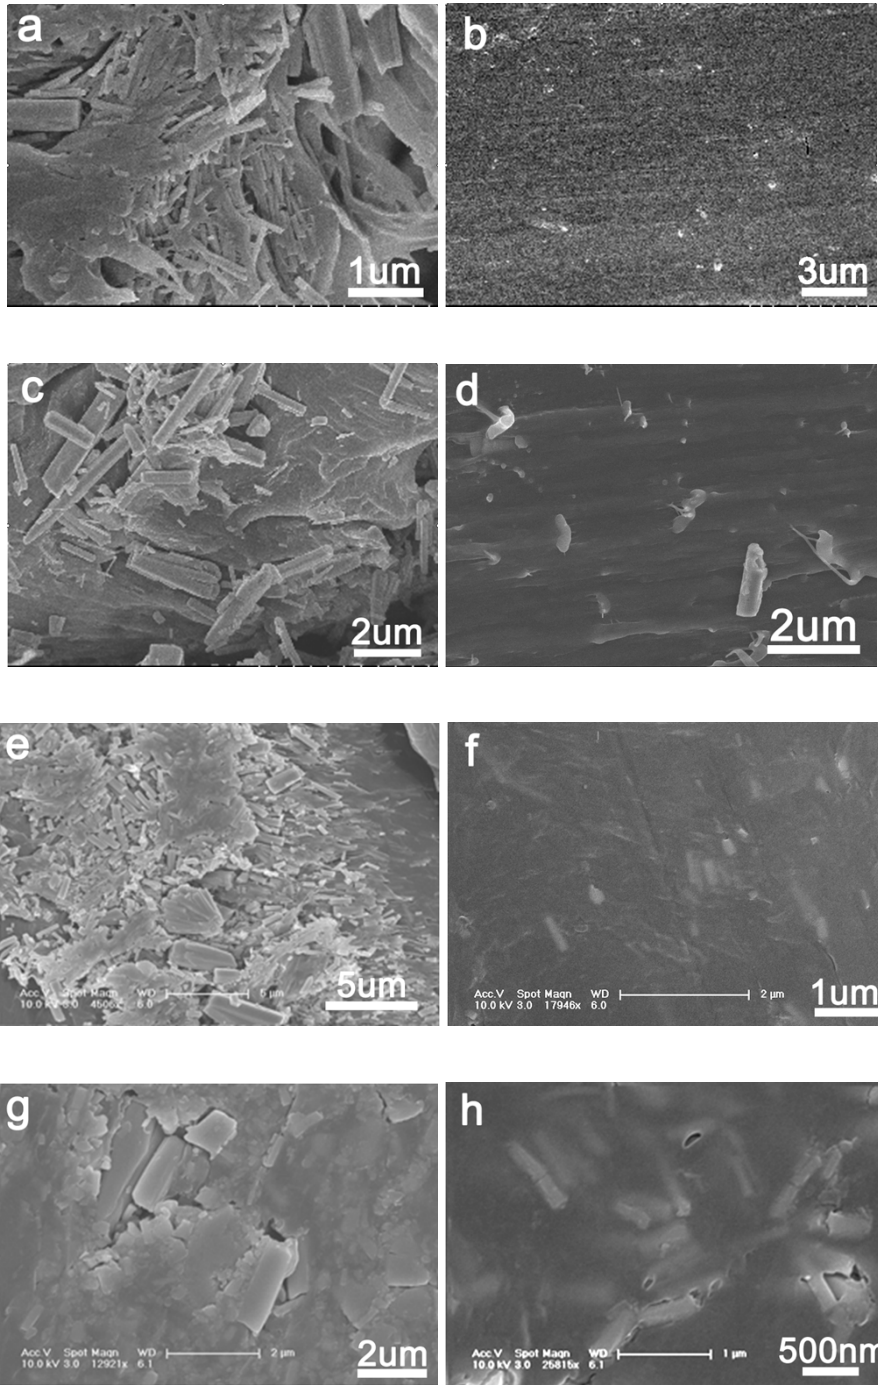

**Figure S2.** The magnified images in the corresponding pictures of Figure 2: (a) and (b) of Figure 2a; (c) and (d) of Figure 2b; (e) and (f) of Figure 2c; (g) and (h) of Figure 2d.

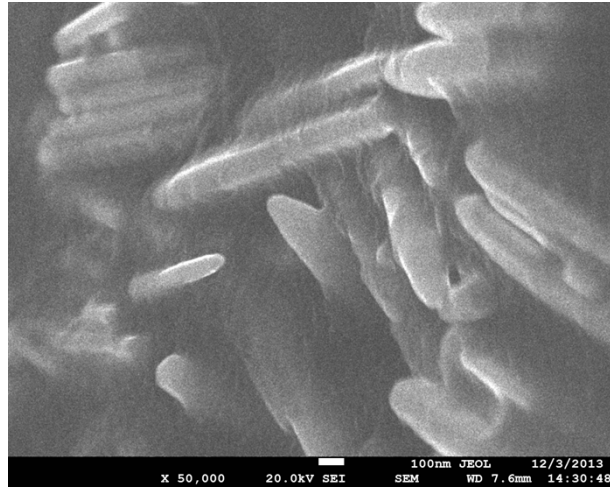

**Figure S3.** Selected magnified connected part.

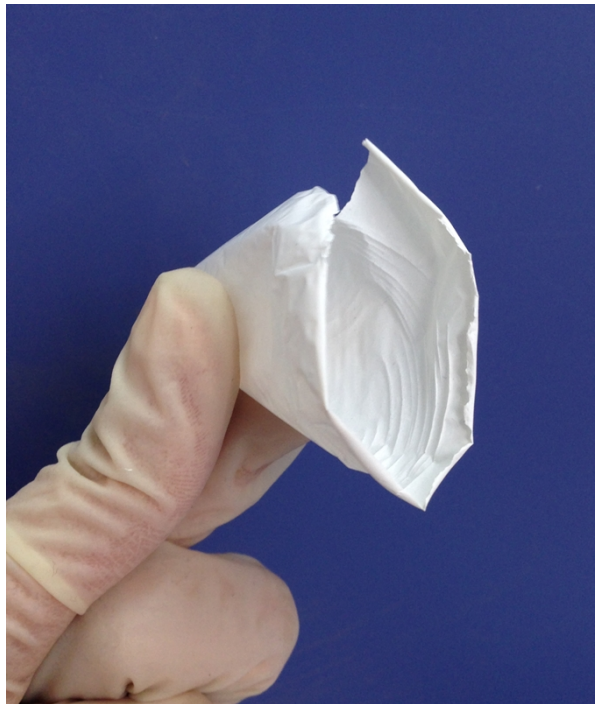

**Figure S4.** The photograph of the ZnO/PVDF film.

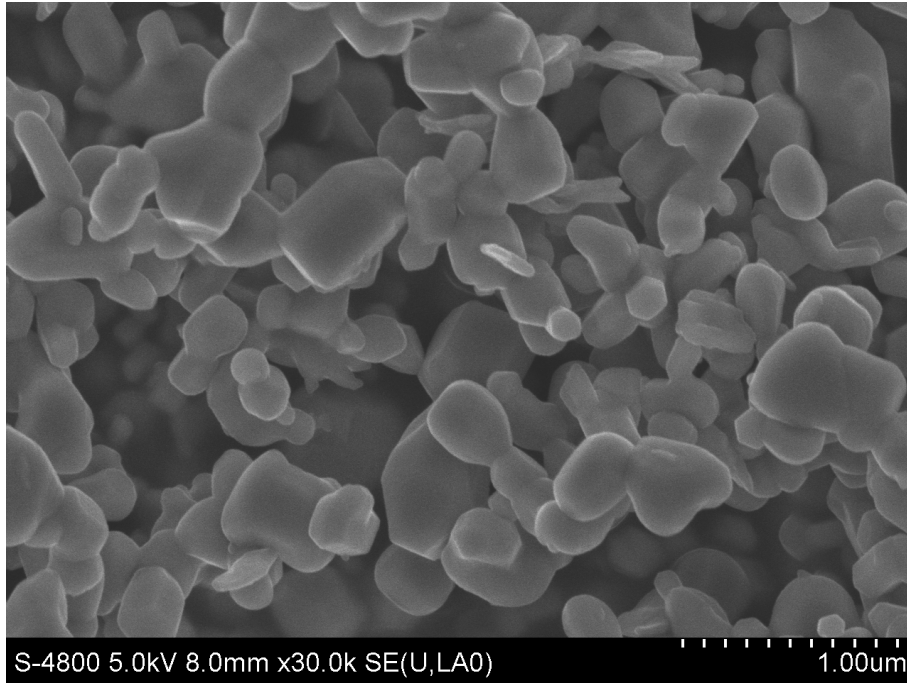

**Figure S5.** The image of used bulk ZnO.

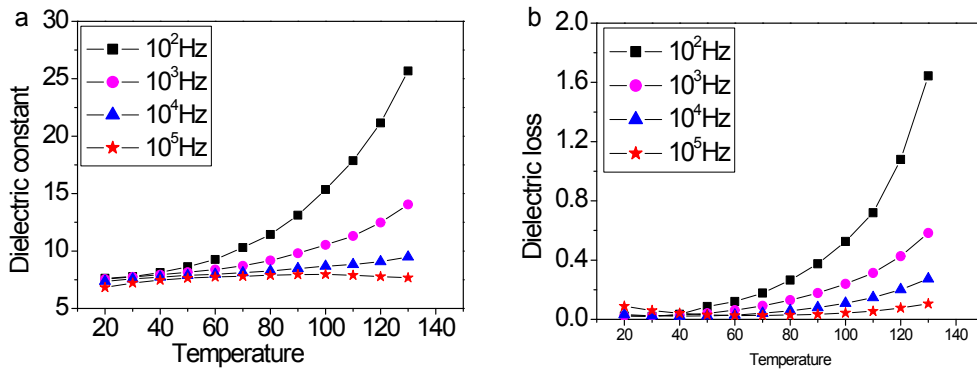

**Figure S6.** Dielectric constants (a) and Dielectric loss (b) of the pure PVDF: At 10<sup>2</sup> Hz, 10<sup>3</sup> Hz, 10<sup>4</sup> Hz and 10<sup>5</sup> Hz vs. temperature.

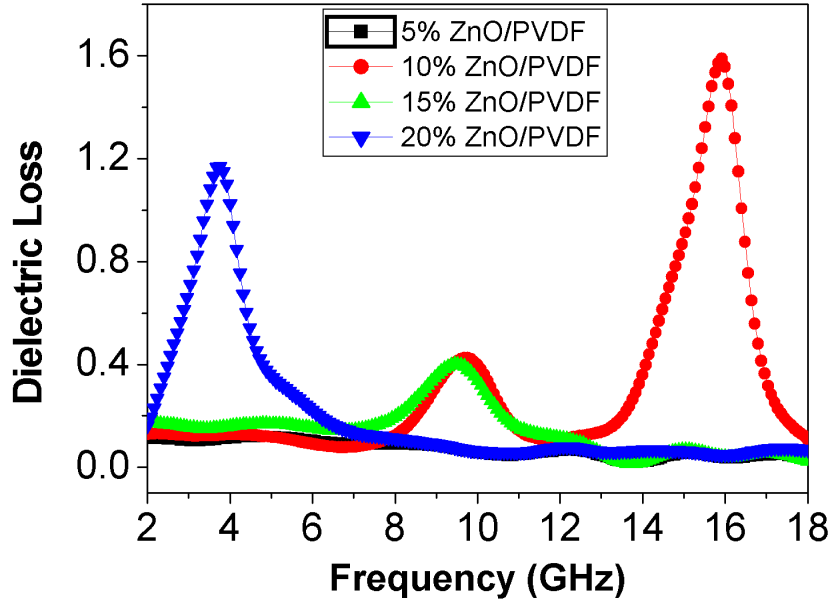

**Figure S7.** The dielectric loss tangent of NR-ZnO/PVDF composites with different loadings

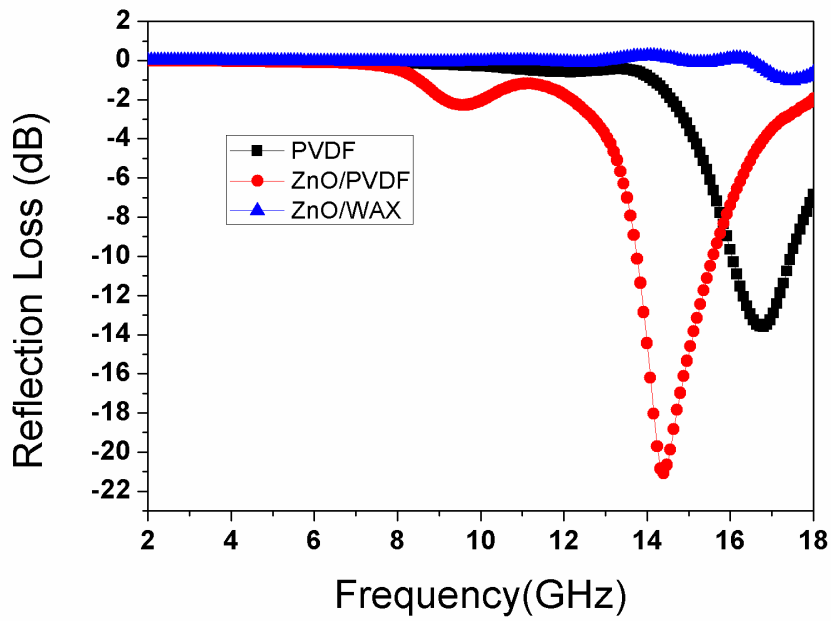

**Figure S8.** RL value of pure PVDF, NR-ZnO/wax and NR-ZnO/PVDF.

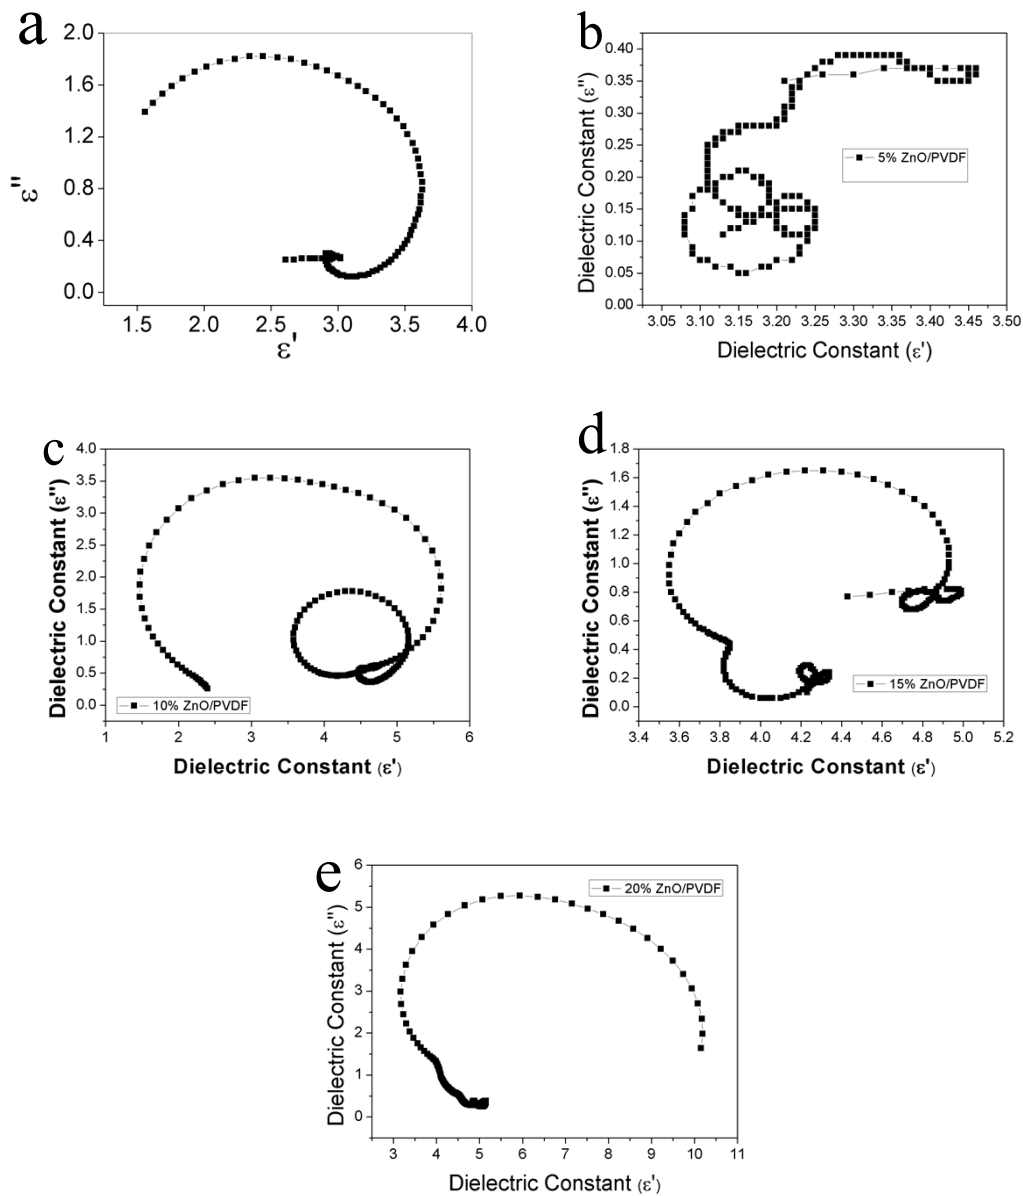

**Figure S9.** The Cole–Cole semicircle of the composites with different filler content: (a) pure PVDF; (b) 5 wt%;(c) 10 wt%;(d) 15 wt%;(e) 20 wt%.
